# Supplementary material for: Generation of transgenic cynomolgus monkeys that express green fluorescent protein throughout the whole body
Source: Sci Rep. 2016 Apr 25;6:24868. doi: 10.1038/srep24868 (PMC4843004; doi:10.1038/srep24868)
Supplement: Supplementary Information [file srep24868-s1.pdf]

## **Supplementary Information**

### **Generation of transgenic cynomolgus monkeys that express green fluorescent protein throughout the whole body**

Yasunari Seita<sup>1,2</sup>, Tomoyuki Tsukiyama<sup>1</sup>, Chizuru Iwatani<sup>1,2</sup>, Hideaki Tsuchiya<sup>1</sup>, Jun Matsushita<sup>1,2</sup>, Takuya Azami<sup>3</sup>, Junko Okahara<sup>4</sup>, Shinichiro Nakamura<sup>1</sup>, Yoshitaka Hayashi<sup>5</sup>, Seiji Hitoshi<sup>5</sup>, Yasushi Itoh<sup>6</sup>, Takeshi Imamura<sup>7</sup>, Masaki Nishimura<sup>8</sup>, Ikuo Tooyama<sup>8</sup>, Hiroyuki Miyoshi<sup>9</sup>, Mitinori Saitou<sup>2, 10, 11, 12</sup>, Kazumasa Ogasawara<sup>6</sup>, Erika Sasaki<sup>4</sup>, and Masatsugu Ema<sup>1</sup>,

13\*

## **Figure Legends**

### **Supplementary Figure 1. Autofluorescence in wild type monkey tissues**

A. Immunohistochemistry of tissues from a day 92 aborted twin foetus detected by confocal microscopy. (Scale bar: 250  $\mu$ m) B. Effect of laser intensity on the fluorescence tissue images detected by confocal microscopy. Inset a, b and c images show renal tubules in the kidney. Inset d and e images show hepatocytes in the liver. Inset f images show the central vein in the liver. (Scale bar: 250  $\mu$ m). C. WT monkey autofluoresces as if it is a GFP Tg monkey. Epifluorescence images of a WT monkey were taken at different exposure time under excitation light (489 nm)

### **Supplementary Figure 2. GFP protein expression in various tissues of day 3 PreI**

#### **Tg #2 offspring**

A. Immunohistochemistry of tissues from a day 3 PreI Tg #2 offspring detected by confocal microscopy. N. A.; Not Analysed. (Scale bar: 100  $\mu$ m) B. Immunohistochemistry of tissues from a day 3 PreI Tg #2 offspring detected by confocal microscopy with high magnification. (Scale bar: 25  $\mu$ m)

**Supplementary Figure 3. Comparison of expression levels of GFP protein from tissues in Tg monkeys and the GFP mice**

Whole blot of fig. 7 pictures. GFP and  $\beta$ -actin bands were cropped from these whole blots. Cropped lines were shown with boxes.

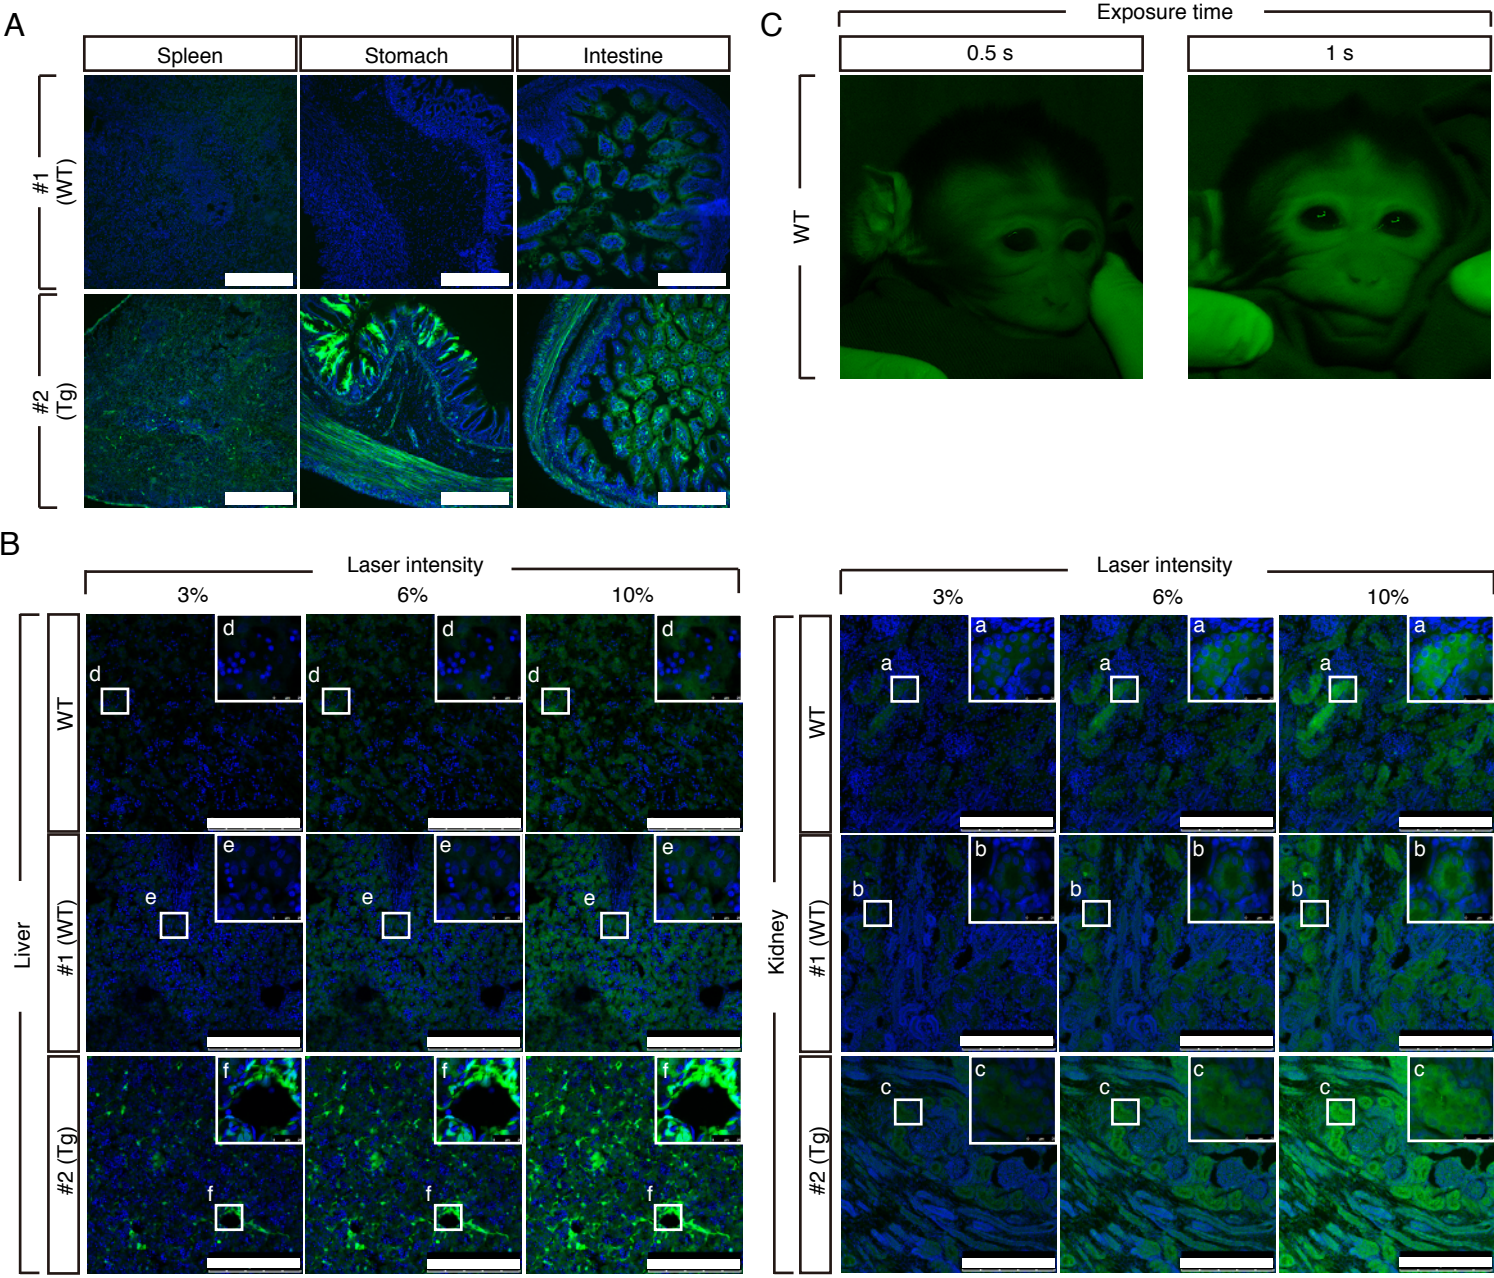

Seita *et al.*, Supplementary Fig. 1

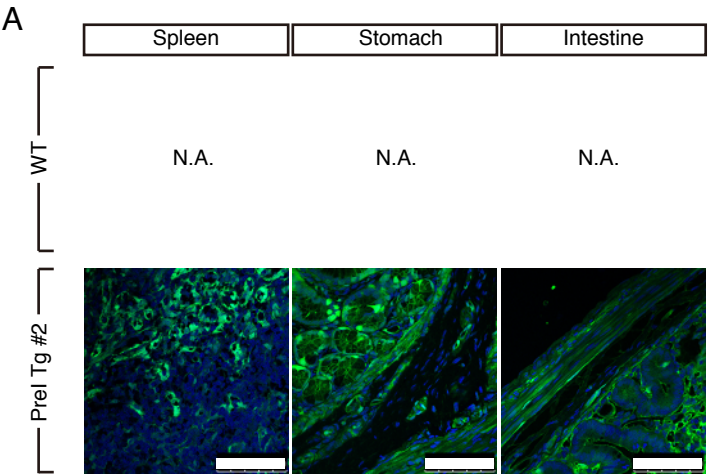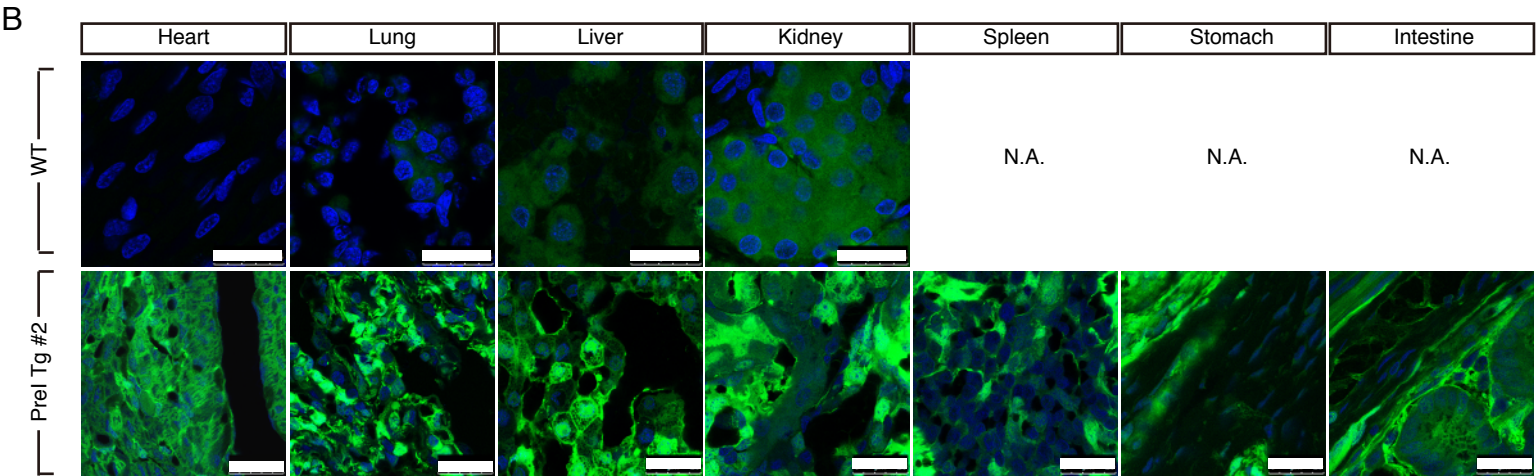

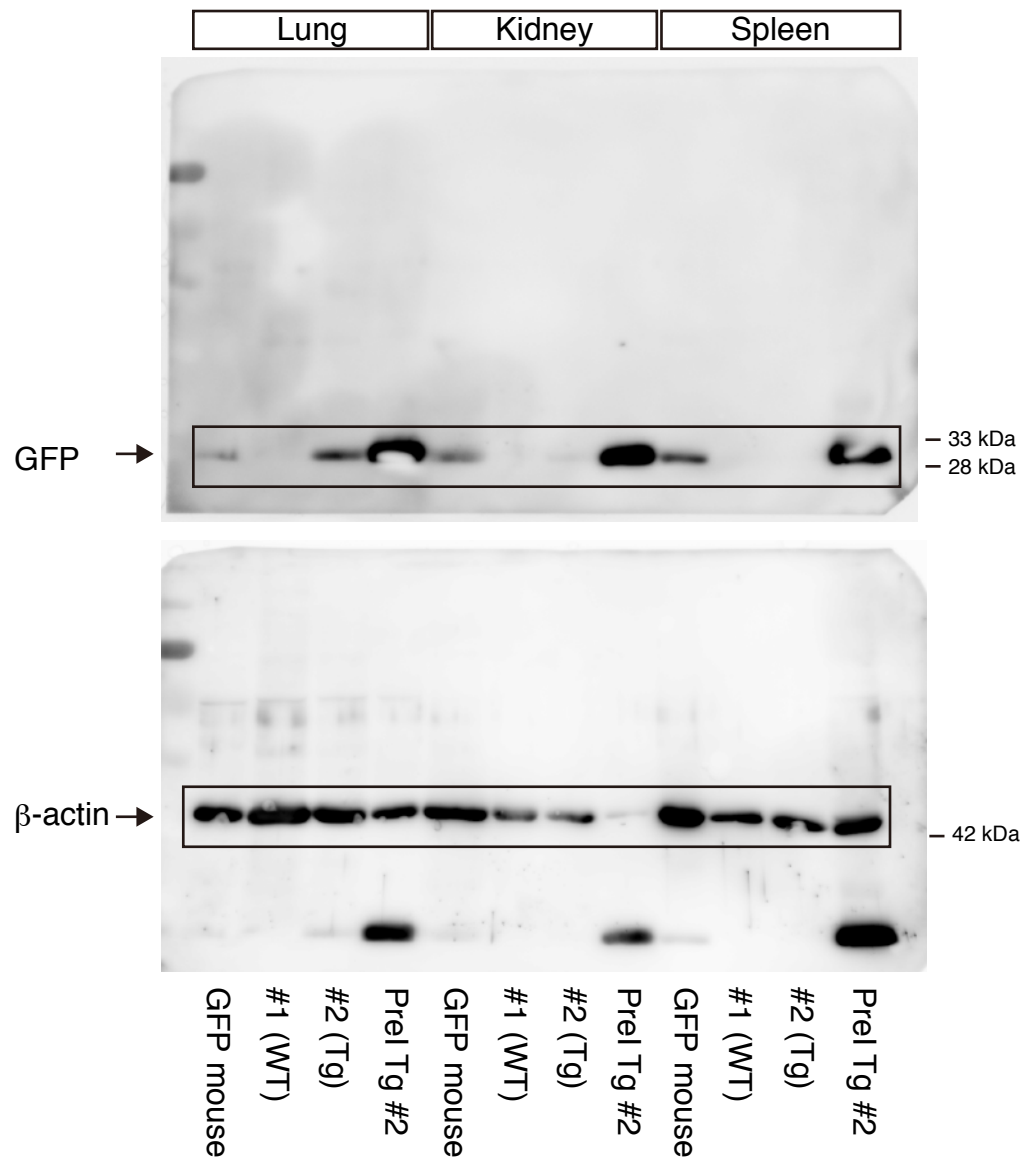

**Table S1: List of PCR primer sequences**

| <b>Gene</b>     | <b>Primer Sequence (Forward)</b> | <b>Primer Sequence (Reverse)</b> |
|-----------------|----------------------------------|----------------------------------|
| GFP             | GCGACGTAAACGGCCACAAGTTCAGC       | CTGGGTGCTCAGGTAGTGGTTGTCG        |
| $\beta$ -globin | GATGAAGTTGGTGAGGC                | ACCCTTGAGGTTGTCCAGGT             |
| GAPDH           | TTCAACAGCGACACCCACTC             | GTTGCTGTAGCCAAATTCGTTG           |
